# Supplementary material for: Is public transport a risk factor for acute respiratory infection?
Source: Springer Nature journal article supplement (doi:10.1186/1471-2334-11-16), 2011-01-14
Supplement: Additional file 2 [file 1471-2334-11-16-s2.docx]

**Additional file 2: Relationship between recent bus/tram use and ARI stratified by habitual use**

| **Stratified by habitual public transport use** | **Unadjusted OR**  **(95% CI)** | **Model 1a:**  **Adjusted OR (95% CI)** | **Model 2b:**  **Adjusted OR**  **(95% CI)** |
| --- | --- | --- | --- |
| < once a week  1-3 times a week  >3 times a week | 2.75 (0.53-14.20)  0.80 (0.42-1.52)  0.79 (0.49-1.29) | 2.73 (0.44-17.02)  0.72 (0.14-3.63)  0.77 (0.47-1.29) | 22.25 (0.81-612.14)  - c  0.89 (0.21-3.81) |

*Logistic regression model: n=127*

*Missing data have been excluded from the analysis; statistically significant results in bold; a adjusted for age, gender and co-morbidity; b adjusted for age, gender, co-morbidity, deprivation, child cohabitation and flu vaccination; c could not be calculated because of insufficient data*
